# Supplementary material
Source: publisher figshare collection journal article supplement (https://gsapubs.figshare.com/articles/dataset/_/23062142)
Supplement: Supplementary file 1 [file 1]

## Sheet: ostracode census data
Table S1. HH12-930GC ostracode census data, radiocarbon dates, and foraminiferal δ13C data
1. Ostracode census data
Sample depth (cm)	Argilloecia cf. robinwhatleyi	Argilloecia cf. conoidea	Argilloecia labri	Argilloecia sp.	Cluthia whatleyi	Coquimba sp.	Cytheropteron aielloi	Cytheropteron arcuatum	Cytheropteron cf. pseudoinflatum	Cytheropteron carolinae	Cytheropteron colesopunctatum	Cytheropteron higashikawai	Cytheropteron inflatum	Cytheropteron lanceae	Cytheropteron parahamatum	Cytheropteron paucipunctatum	Cytheropteron perlaria	Cytheropteron pseudoinflatum	Cytheropteron tumefactum	Cytheropteron sp.	Eucythere argus	Eucytherura sp.	Finmarchinella finmarchica	Jonesia acuminata	Krithe hunti	Krithe minima	Muellerina abyssicola	Paradoxostomatid sp.	Polycope bireticulata	Polycope inornata	Polycope reticulata	Polycope sp.	Propontocypris sp.	Pseudocythere caudata	Rabilimis septentrionalis	Robertsonites tuberculatus	Rosaliella svalbardensis	Sarsicytheridea bradii	Sarsicytheridea punctillata	Swainocythere nanseni	Total
0.5	0	0	0	0	0	0	0	0	0	0	0	0	0	0	0	0	0	0	0	0	0	0	0	0	1	0	2	0	0	0	0	0	0	0	0	1	0	0	0	0	4
15.5	0	0	0	0	0	0	0	0	0	0	0	0	0	0	0	0	0	0	0	0	0	0	0	0	0	0	0	0	0	0	0	0	0	0	0	0	0	0	0	0	0
20.5	1	0	0	0	0	0	0	0	0	0	0	0	0	0	0	0	0	0	0	0	0	0	0	0	0	1	0	0	0	0	0	0	0	0	0	0	0	0	0	0	2
25.5	0	3	0	0	0	0	0	0	0	0	0	0	0	0	0	0	0	0	0	0	0	0	0	0	0	1	0	0	0	0	0	0	0	0	0	0	0	0	0	0	4
33.5	0	0	0	0	0	0	0	0	0	0	0	0	1	0	0	0	0	0	0	0	0	0	0	0	0	0	0	0	0	2	0	0	0	0	0	0	0	0	0	0	3
38.5	0	0	0	0	0	0	0	0	0	0	0	0	0	0	0	0	0	0	0	0	0	0	0	0	3	0	0	0	0	0	0	0	0	0	0	0	0	0	0	0	3
43.5	0	0	0	0	0	0	0	0	0	0	0	0	0	0	0	0	0	0	0	0	0	0	0	0	0	2	0	0	0	0	0	0	0	0	0	0	0	0	0	1	3
48.5	0	0	0	0	0	0	0	0	0	0	0	0	0	0	0	0	0	0	0	0	0	0	0	0	0	0	0	0	0	0	0	0	0	0	0	0	0	0	0	0	0
53.5	0	0	0	0	0	0	0	0	0	0	0	0	0	0	0	0	0	0	0	0	0	0	0	0	0	0	0	0	0	0	0	0	0	0	0	0	0	0	0	0	0
58.5	0	0	0	0	0	0	0	0	0	0	0	0	0	0	0	0	0	0	0	0	0	0	0	0	0	0	0	0	0	0	0	0	0	0	0	0	0	0	0	0	0
63.5	0	0	0	0	0	0	0	0	0	0	0	0	0	0	0	0	0	0	0	0	0	0	0	0	0	0	0	0	0	0	0	0	0	0	0	0	0	0	0	0	0
68.5	0	0	0	0	0	1	0	0	0	0	0	0	0	0	0	0	0	0	0	0	0	0	0	0	3	0	0	0	0	0	0	0	0	0	0	0	0	0	0	0	4
73.5	0	0	0	0	0	0	0	0	0	0	0	0	0	0	0	0	0	0	0	0	0	0	0	0	0	0	0	0	0	0	0	0	0	0	0	0	0	0	0	0	0
78.5	0	0	0	0	0	0	0	0	0	0	0	0	0	0	0	0	0	0	0	0	0	0	0	0	0	0	0	0	0	0	0	0	0	0	0	0	0	0	0	0	0
83.5	0	0	0	0	0	0	0	0	0	0	0	0	0	0	0	0	0	0	0	0	0	0	0	0	0	0	0	0	0	0	0	0	0	0	0	0	0	0	0	0	0
88.5	0	0	0	0	0	0	0	0	0	0	0	0	0	0	1	0	1	0	0	0	0	0	0	0	3	0	0	0	0	0	0	0	0	0	0	0	0	0	1	0	6
93.5	0	0	0	0	0	0	0	0	0	0	0	0	0	0	0	1	0	0	0	0	0	0	0	0	0	0	0	0	0	0	0	0	0	0	0	0	0	0	0	0	1
98.5	0	0	0	0	1	0	0	1	0	1	0	0	0	0	5	0	0	0	0	0	0	0	0	0	3	0	0	0	0	0	0	0	0	0	0	0	0	0	1	1	13
103.5	0	0	0	0	0	0	0	0	0	1	0	0	0	0	11	0	0	0	0	0	0	0	0	0	6	0	0	1	0	0	0	0	0	0	0	0	0	0	0	0	19
108.5	0	1	0	0	0	0	0	0	0	0	0	0	0	0	2	0	1	0	0	0	0	0	0	0	0	0	0	0	0	0	0	0	0	0	1	0	0	2	0	0	7
113.5	0	0	0	0	0	0	0	0	0	0	0	0	0	0	2	0	0	0	0	1	0	0	0	0	0	0	0	1	0	0	0	0	0	1	0	0	0	0	0	0	5
118.5	0	0	0	0	0	0	0	0	0	0	0	2	0	0	24	0	2	0	0	0	0	0	0	0	1	0	0	0	2	1	0	0	0	3	0	0	0	0	0	3	38
123.5	0	0	0	0	0	0	0	0	0	0	0	0	0	0	9	0	0	0	0	0	0	0	0	0	1	0	0	0	1	0	0	1	0	12	0	0	0	0	0	0	24
128.5	0	0	0	0	0	0	0	0	0	0	0	1	0	0	11	0	1	0	0	0	0	0	0	0	0	0	0	0	0	0	3	0	0	3	0	0	0	1	0	0	20
133.5	0	0	0	0	0	0	0	0	0	0	0	0	0	0	4	0	0	0	0	0	0	0	0	0	0	0	0	0	0	0	0	1	0	2	0	0	0	1	0	1	9
138.5	0	0	0	0	0	0	0	1	0	0	0	0	0	0	3	0	0	0	0	0	0	0	0	0	1	0	0	0	0	0	0	1	0	0	0	0	0	1	0	0	7
148.5	0	0	0	0	0	0	0	0	3	0	0	0	0	0	15	2	1	0	0	0	0	0	0	0	6	0	0	0	0	0	0	1	0	1	0	0	0	0	0	0	29
153.5	0	0	0	0	0	0	0	0	0	0	0	1	0	0	1	0	0	0	0	0	0	1	0	0	0	0	0	0	0	0	0	0	0	0	0	0	0	0	0	0	3
163.5	0	0	0	0	0	0	0	0	0	0	0	0	0	0	0	2	0	0	0	0	0	0	0	0	1	0	0	0	0	0	0	0	0	0	0	0	0	0	0	0	3
173.5	0	0	0	0	0	0	0	0	0	0	0	0	0	0	0	0	0	0	0	0	0	0	0	0	0	0	0	0	0	0	0	0	0	0	0	0	0	0	0	0	0
183.5	0	0	0	0	0	0	0	0	0	0	0	0	0	0	0	0	0	0	0	0	0	0	0	0	0	0	0	0	0	0	0	0	0	0	0	0	0	0	0	0	0
193.5	0	0	0	0	0	0	0	0	0	0	0	0	0	0	0	0	0	0	0	0	0	0	0	0	0	0	0	0	0	0	0	0	0	0	0	0	0	0	0	0	0
203.5	0	0	0	0	0	0	0	0	0	0	0	0	0	0	0	0	0	0	0	0	0	0	0	0	0	0	0	0	0	0	0	0	0	0	0	0	0	0	0	0	0
213.5	0	0	0	0	0	0	0	0	0	0	0	0	0	0	0	0	0	0	0	0	0	0	0	0	0	0	0	0	0	0	0	0	0	0	0	0	0	0	0	0	0
223.5	0	0	0	0	0	0	0	0	0	0	0	0	0	0	0	0	0	0	0	0	0	0	0	0	0	0	0	0	0	0	0	0	0	0	0	0	0	0	0	0	0
233.5	0	0	0	0	0	0	0	0	0	0	0	0	0	0	0	0	0	0	0	0	0	0	0	0	0	0	0	0	0	0	0	0	0	0	0	0	0	0	0	0	0
243.5	0	0	0	0	0	0	0	0	0	0	0	0	0	0	0	0	0	0	0	0	0	0	0	0	0	0	0	0	0	0	0	0	0	0	0	0	0	0	0	0	0
253.5	0	0	0	0	0	0	0	0	0	0	0	0	0	0	0	0	0	0	0	0	0	0	0	0	0	0	0	0	0	0	0	0	0	0	0	0	0	0	0	0	0
263.5	0	0	0	0	0	0	0	0	0	0	0	0	0	0	0	0	0	0	0	0	0	0	0	0	0	0	0	0	0	0	0	0	0	0	0	0	0	0	0	0	0
273.5	0	0	0	0	0	0	0	0	0	0	0	1	0	0	4	0	0	0	0	0	0	0	0	0	0	0	0	0	0	0	0	0	0	0	0	0	0	0	0	0	5
283.5	0	0	0	0	0	0	0	0	0	0	0	0	0	0	2	0	0	0	0	0	0	0	0	0	0	0	0	0	0	0	0	0	0	0	0	0	0	0	0	0	2
293.5	0	0	0	2	0	0	4	0	5	1	1	19	0	1	15	0	8	0	2	0	0	0	0	0	56	3	0	0	0	0	18	1	0	10	0	0	0	0	0	0	146
303.5	0	0	0	0	0	0	2	0	0	0	0	1	0	0	11	0	1	3	0	0	1	0	0	0	20	2	0	0	0	1	0	0	1	0	0	0	1	0	0	0	44
313.5	0	0	0	0	0	0	0	0	0	0	0	0	0	0	0	0	0	0	0	0	0	0	0	0	8	0	0	0	0	0	0	0	0	0	0	0	1	0	0	0	9
323.5	0	0	0	0	0	0	0	0	1	0	0	0	0	0	1	0	0	0	0	0	0	1	0	0	8	3	0	0	0	0	0	0	0	0	0	0	1	0	0	1	16
324.5	0	0	0	0	0	0	0	0	0	0	0	0	0	0	2	0	0	0	0	0	1	0	0	0	4	3	0	0	0	0	0	0	0	0	0	0	1	0	0	0	11
333.5	1	0	0	0	0	0	0	0	0	0	0	0	1	0	2	0	0	0	0	0	0	0	0	0	6	0	0	0	0	0	0	0	0	0	0	0	1	0	0	0	11
343.5	0	0	0	0	0	0	0	0	0	0	0	0	0	0	0	0	0	0	0	0	0	0	0	0	3	0	0	0	0	0	0	0	0	0	0	0	0	0	0	0	3
353.5	0	0	0	1	0	0	1	0	0	0	2	0	0	0	3	0	0	0	0	0	1	0	0	0	7	0	0	2	0	0	0	0	0	1	0	0	2	0	0	0	20
363.5	0	0	0	0	0	0	0	0	0	0	1	0	0	0	0	0	0	0	0	0	0	0	0	0	5	0	0	0	0	0	0	0	0	0	0	0	0	0	0	0	6
373.5	0	0	0	0	0	0	0	0	0	0	0	0	0	0	16	0	0	3	0	0	0	0	1	0	31	1	0	0	0	0	0	0	1	0	0	0	1	0	0	0	54
383.5	0	0	0	0	0	0	0	0	0	0	0	0	0	0	1	0	0	1	0	0	0	0	0	0	10	0	0	0	0	0	0	0	0	0	0	0	0	0	0	0	12
393.5	0	0	0	0	0	0	0	0	0	0	0	0	0	0	0	0	0	0	0	0	0	0	0	0	3	0	0	0	0	0	0	0	0	0	0	0	0	0	0	0	3
403.5	0	0	0	0	0	0	0	0	0	0	0	0	0	0	0	0	0	0	0	0	0	0	0	0	1	0	0	0	0	0	0	0	0	0	0	0	0	0	0	0	1
413.5	0	0	0	0	0	0	0	0	0	0	0	0	0	0	0	26	0	0	0	0	0	0	0	0	10	0	0	0	0	0	0	0	0	1	0	0	0	0	0	1	38
418.5	0	0	0	0	2	0	0	0	1	0	0	0	0	0	5	0	0	0	0	0	0	0	0	0	24	0	0	1	0	0	0	0	0	0	0	0	7	0	0	0	40
423.5	0	0	0	0	0	0	0	0	1	0	0	0	0	0	0	0	0	0	0	0	0	0	0	0	2	0	0	0	0	0	0	0	0	0	0	0	10	0	0	0	13
428.5	0	0	0	0	1	0	1	0	0	0	0	0	0	0	1	0	0	0	0	0	0	0	0	0	28	0	0	1	0	0	0	0	0	1	0	0	0	0	0	0	33
433.5	0	0	0	0	0	0	1	0	1	0	0	0	0	0	1	0	0	0	0	0	0	0	0	0	12	0	0	0	0	0	0	0	0	0	0	0	0	0	0	0	15
443.5	0	0	0	0	0	0	5	0	11	0	0	0	0	0	3	0	0	0	0	0	1	0	0	0	21	2	0	0	0	0	0	0	0	0	0	0	0	0	0	1	44
453.5	0	0	0	0	0	0	0	0	0	0	0	0	0	0	1	0	0	0	0	0	0	0	0	0	0	0	0	0	0	0	0	0	0	0	0	0	0	0	0	0	1
463.5	0	0	0	0	0	0	0	0	0	0	0	0	0	0	0	0	0	0	0	0	0	0	0	0	0	0	0	0	0	0	0	0	0	0	0	0	0	0	0	0	0
473.5	0	0	0	0	0	0	0	0	2	0	0	0	0	0	0	0	0	0	0	0	0	0	0	0	8	0	0	0	0	0	0	0	0	0	0	0	0	0	0	0	10
483.5	0	0	0	0	0	0	2	0	3	0	0	1	0	0	4	0	0	0	0	0	0	0	0	0	3	1	0	18	0	0	0	0	0	1	0	0	0	0	0	0	33
493.5	2	0	0	0	0	0	0	0	0	6	0	0	0	0	1	0	0	0	0	0	0	0	0	0	0	0	0	0	0	0	0	0	0	0	0	0	0	0	0	0	9
503.5	0	0	0	0	0	0	0	0	0	1	0	1	0	0	3	0	0	0	0	0	0	0	0	0	0	0	0	0	0	0	0	0	0	0	0	0	0	0	0	0	5
513.5	0	0	0	0	0	0	0	0	0	0	0	0	0	0	2	0	0	0	0	0	0	0	0	0	0	0	0	0	0	0	0	0	0	0	0	0	0	0	0	0	2
523.5	0	0	0	0	0	0	0	0	0	0	0	0	0	0	0	0	0	0	0	0	0	0	0	0	0	0	0	0	0	0	0	0	0	0	0	0	0	0	0	0	0
533.5	0	0	0	0	0	0	0	0	0	2	0	0	0	0	1	0	0	0	0	0	0	0	0	0	0	0	1	0	0	0	0	0	0	0	0	0	0	0	0	0	4
Total	4	4	0	3	4	1	16	2	28	12	4	27	2	1	167	31	15	7	2	1	4	2	1	0	299	19	3	24	3	4	21	5	2	36	1	1	25	5	2	9	797

## Sheet: radiocarbon dates
2. Radiocarbon dates
		14C age		Calendar age
Depth (cm)	Sample type	(yr BP)	(Error)	(median, cal yr BP)	(95% range)
35.5	Planktic and benthic foraminifera	9313	48	9946	10154–9714
148.5	Benthic foraminifera	12587	67	14018	14299–13769
283.5	Planktic and benthic foraminifera	12974	66	14684	14993–14330
298.5*	Neogloboquadrina pachyderma	15572	68	18031	18245–17776
318.5	Neogloboquadrina pachyderma	16649	61	19186	19446–18923
320.5*	Bivalve shell (Vesicomyidae)	18254	86	21131	21471–20810
433.5*	Neogloboquadrina pachyderma	25022	180	28357	28779–27863
508.5*	Bivalve shell fragment	34074	554	38108	39396–36742
*dates from Myrvang (2015).

## Sheet: foraminiferal d13C data
3. Foraminiferal d13C data
Cassidulina neoteretis				Neogloboquadrina pachyderma				Melonis barleeanus				Islandiella norcrossi
Depth (cm)	d13C (‰)	d18O (‰)		Depth (cm)	d13C (‰)	d18O (‰)		Depth (cm)	d13C (‰)	d18O (‰)		Depth (cm)	d13C (‰)	d18O (‰)
0.5	-0.537	4.451		0.5	0.309	3.022		0.5	-1.96	4.087		488.5	-2.788	5.246
5.5	-0.314	4.436		5.5	0.188	2.968		5.5	-1.796	4.186		498.5	-9.872	5.912
10.5	-0.565	4.662		10.5	0.135	2.991		10.5	-1.988	4.434		503.5	-5.568	5.669
88.5	-1.075	4.841		15.5	0.673	3.678		15.5	-2.061	4.482		513.5	-2.331	5.251
98.5	-1.302	5.195		20.5	0.061	2.973		20.5	-2.81	4.498		518.5	-10.683	5.339
103.5	-1.52	5.124		25.5	0.134	3.005		25.5	-2.406	4.551		523.5	-11.919	5.31
108.5	-1.495	5.202		30.5	0.129	3.207		30.5	-2.24	4.555		528.5	-4.941	5.387
113.5	-1.85	5.115		33.5	0.144	3.062		33.5	-2.788	4.518		533.5	-4.96	5.391
118.5	-1.73	5.174		38.5	0.197	3.135		38.5	-2.245	4.463
123.5	-2.04	5.177		43.5	0.053	3.116		43.5	-2.377	4.492
128.5	-2.081	5.284		58.5	0.048	3.471		48.5	-2.019	4.467
133.5	-1.628	5.144		63.5	0.061	3.376		53.5	-1.88	4.215
138.5	-1.421	5.152		68.5	0.271	3.149		58.5	-1.815	4.179
143.5	-1.28	5.165		83.5	0.061	3.912		63.5	-1.502	3.958
148.5	-0.816	5.253		88.5	-0.074	3.835		68.5	-1.629	4.656
153.5	-1.015	5.008		93.5	-0.048	3.96		83.5	-1.603	4.719
158.5	-0.647	5.159		98.5	-0.395	3.894		88.5	-2.625	4.744
163.5	-0.517	5.281		103.5	-0.348	3.701		93.5	-1.812	4.763
168.5	-1.14	5.237		108.5	-0.218	3.986		98.5	-2.355	4.736
173.5	-0.922	5.273		113.5	-0.324	3.801		103.5	-2.415	4.713
178.5	-0.838	5.294		118.5	-0.788	3.731		108.5	-2.595	4.711
183.5	-0.97	5.272		123.5	-0.367	3.776		113.5	-3.372	4.628
188.5	-1.353	5.371		128.5	-0.134	4.14		118.5	-2.588	4.692
193.5	-1.227	5.357		133.5	-0.318	3.91		413.5	-2.214	5.22
198.5	-1.176	5.395		138.5	-0.431537	4.09091		483.5	-4.537	4.735
203.5	-1.628	5.382		143.5	-0.12	3.669		488.5	-3.19	5.037
208.5	-1.641	5.366		148.5	-0.169	4.168		498.5	-8.192	4.987
213.5	-1.878	5.347		153.5	-0.207	3.98		503.5	-5.107	5.13
218.5	-1.714	5.377		158.5	0.079	3.807		508.5	-2.303	4.101
223.5	-1.437	5.332		163.5	-0.282	3.951		513.5	-2.256	4.486
228.5	-1.893	5.37		168.5	0.013	3.98		518.5	-5.671	4.909
233.5	-1.779	5.326		173.5	-0.275	3.904
243.5	-1.851	5.413		178.5	-0.0639174	4.08568
248.5	-1.75	5.32		198.5	-0.239135	4.20457
253.5	-2.234	5.343		203.5	-0.423	4.083
258.5	-1.381	5.383		218.5	-0.455003	4.06068
263.5	-1.314	5.399		233.5	-0.752947	4.27427
268.5	-1.853	5.359		248.5	-1.166	4.422
273.5	-1.25	5.229		253.5	-1.153	4.215
278.5	-1.588	5.294		258.5	-0.596	4.163
283.5	-1.891	5.223		263.5	-0.148	4.251
288.5	-0.991	4.852		268.5	-0.343	4.052
293.5	-1.12	4.605		273.5	-0.396	4.213
298.5	-1.229	5.419		278.5	-0.415	4.036
303.5	-1.392	5.35		283.5	-0.65	4.152
308.5	-1.306	5.435		288.5	-0.447	3.167
313.5	-2.266	5.581		293.5	-0.436	2.354
314.5	-1.402	5.388		298.5	-0.188	3.774
316.5	-1.547	5.424		303.5	-0.405	3.599
317.5	-1.211	5.373		308.5	-0.288	4.812
318.5	-0.913	5.461		313.5	-0.194	4.782
319.5	-1.248	5.442		318.5	0.096	4.643
321.5	-0.83	5.44		323.5	0.169	4.814
322.5	-0.917	5.416		328.5	-0.28	4.6
323.5	-1.349	5.569		333.5	-0.594	4.463
324.5	-1.039	5.382		338.5	-0.214	4.641
328.5	-2.316	5.595		343.5	-0.995	4.57
333.5	-1.214	5.444		348.5	-0.109	4.584
338.5	-1.132	5.473		353.5	-3.468	4.296
343.5	-1.058	5.485		358.5	-0.715	4.563
348.5	-1.449	5.415		363.5	-0.654	4.706
353.5	-3.379	5.418		368.5	-0.938	4.732
358.5	-1.859	5.452		378.5	-0.366	4.7
363.5	-1.682	5.628		383.5	-0.981	4.651
368.5	-2.57	5.535		388.5	-2.416	4.705
373.5	-1.051	5.407		393.5	-0.888	4.554
378.5	-1.865	5.289		403.5	-2.259	4.687
383.5	-1.621	5.537		413.5	-6.083	4.839
388.5	-7.379	5.706		418.5	-0.518	4.503
413.5	-6.754	5.669		423.5	-0.665	4.138
418.5	-1.315	5.483		428.5	-2.448	4.841
423.5	-3.025	5.151		433.5	-0.548	4.387
428.5	-0.81	5.03		438.5	-1.645	4.402
433.5	-1.525	4.919		443.5	-0.647	4.023
438.5	-3.121	5.342		448.5	-0.931	3.838
443.5	-1.62	4.704		453.5	-0.425	4.474
448.5	-3.868	5.29		458.5	-0.066	4.476
453.5	-2.162	5.379		463.5	-4.088	4.716
458.5	-1.043	5.363		468.5	-0.452	4.43
463.5	-5.752	5.785		473.5	-0.319	4.228
468.5	-1.529	5.388		478.5	-0.592	4.465
473.5	-1.244	5.345		483.5	-0.562	4.072
478.5	-2.435	5.617		488.5	-3.638	4.472
483.5	-3.309	5.349		493.5	-6.46	4.674
493.5	-6.16	5.475		498.5	-6.393	4.582
498.5	-9.536	5.673		503.5	-8.758	4.755
503.5	-8.962	5.702		508.5	-1.939	4.211
508.5	-2.348	4.977		513.5	-7.954	4.499
518.5	-16.367	5.469		518.5	-10.444	4.638
				523.5	-6.506	4.473
				528.5	-11.341	4.578
				533.5	-7.946	4.575
