# Supplementary material
Source: publisher figshare collection journal article supplement (https://gsapubs.figshare.com/articles/dataset/_/23062142)
Supplement: Supplementary file 1 [file 1]

Chu, R.W.C., et al., 2023, **Late Quaternary paleoceanography of Vestnesa Ridge, Fram Strait: Ostracode species as a potential indicator of cold seep activity:** Geology, <https://doi.org/10.1130/G51237.1>

## Supplemental Material

**Table S1.**
